# Supplementary material for: Neurovascular coupling alterations in type 2 diabetes: a 5-year longitudinal MRI study
Source: HighWire-hosted journal article supplement (doi:10.1136/bmjdrc-2020-001433), 2021-01-01
Supplement: bmjdrc-2020-001433supp001_data_supplement.pdf [file bmjdrc-2020-001433supp001_data_supplement.pdf]

## Supplementary materials

### Inter-group comparison of decline patterns within the T2DM patients and HCs

#### Method

To exclude the possible influence of the baseline level on the results of the study, for each ROI,  $\Delta r$  of the mReHO/mCBF ratio were further calculated. Inter-group comparison of decline patterns within the T2DM patients and HCs were performed by using the two samples *t*-tests with Bonferroni correction for multiple comparisons ( $P < 0.05$ ).

#### Result

A significant difference in  $\Delta r$  of the mReHO/mCBF ratio was found in the ROI of the left insula ( $t = 3.363$ ,  $P = 0.001$ , Bonferroni corrected) between the T2DM patients and the HCs group. No significant inter-group difference was observed in the other three clusters (Supplementary materials **Table S1**).

**Table S1** Between-group comparison of changing rate of mReHo/mCBF ratio in four clusters with significant longitudinal changes in type 2 diabetic patients (Mean $\pm$ SD).

| Brain region             | Patient            | HC                 | <i>t</i> | <i>P</i>      |
|--------------------------|--------------------|--------------------|----------|---------------|
| Left insula              | -0.174 $\pm$ 0.149 | 0.039 $\pm$ 0.338  | 3.363    | <b>0.001*</b> |
| Left post-central gyrus  | -0.158 $\pm$ 0.238 | -0.143 $\pm$ 0.261 | 0.227    | 0.821         |
| Right rolandic operculum | -0.174 $\pm$ 0.144 | -0.056 $\pm$ 0.304 | 2.052    | 0.045         |
| Right pre-central gyrus  | -0.164 $\pm$ 0.132 | -0.067 $\pm$ 0.272 | 1.857    | 0.069         |

---

Two sample t-test for normally distributed continuous data (means  $\pm$  SD).

\* Significance after Bonferroni-correction ( $p < 0.05/4$ ).
